# Supplementary material
Source: Springer Nature journal article supplement (https://www.springermedizin.de/resource/supplementary/12967_2009_446_MOESM2_ESM.pdf/9576552)
Supplement: MOESM2 [file 9576552]

**A**Control      CD34<sup>+</sup>      ALDH<sup>low</sup>      ALDH<sup>high</sup>      ALDH<sup>high</sup>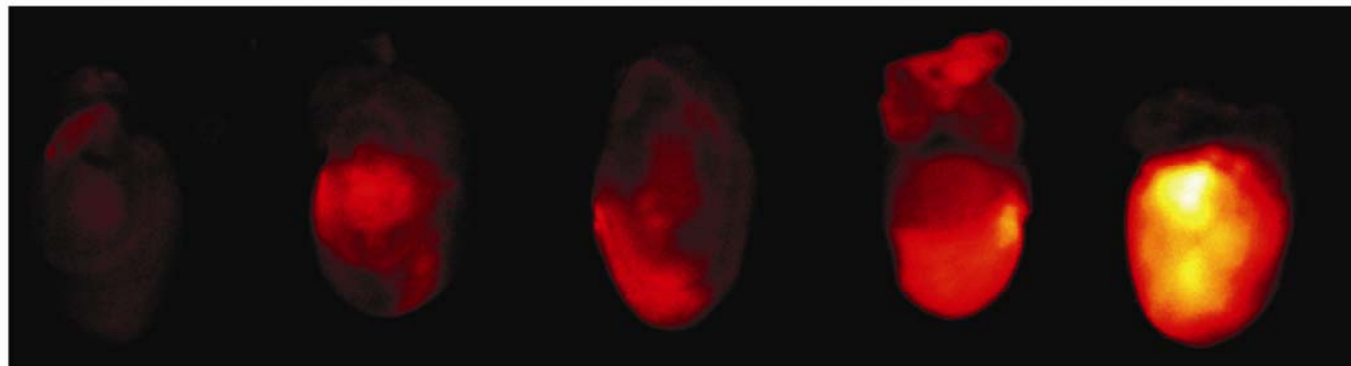Relative  
intensity

1.0

2.6

2.5

5.3

8.3

**B**Control      CD34<sup>+</sup>      ALDH<sup>low</sup>      ALDH<sup>high</sup>      ALDH<sup>high</sup>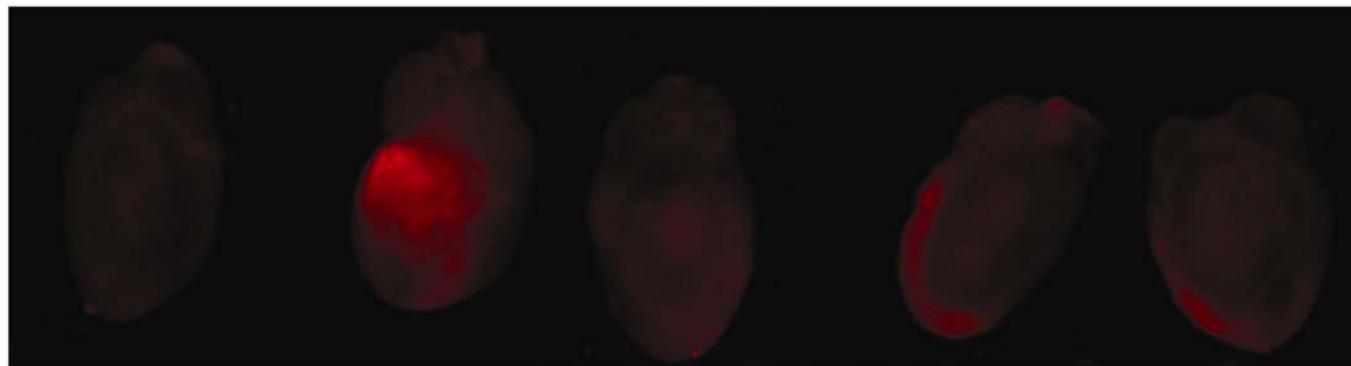Relative  
intensity

1.0

3.2

1.5

1.6

1.5
